# Supplementary material for: Genomic and Metabolomic Insights into Secondary Metabolites of the Novel Bacillus halotolerans Hil4, an Endophyte with Promising Antagonistic Activity against Gray Mold and Plant Growth Promoting Potential
Source: MDPI journal article supplement (doi:10.3390/microorganisms9122508), 2021-12-03
Supplement: s1 [file s1]

**Table S1.** Genes involved in plant growth promotion and colonization harbored in the *B. halotolerans* Hil4 genome.

| Gene Name   | Product                                                           | Function                             |
|-------------|-------------------------------------------------------------------|--------------------------------------|
| <i>ysnE</i> | N-Acetyltransferase                                               | IAA synthesis                        |
| <i>trpA</i> | Tryptophan synthase alpha chain                                   |                                      |
| <i>trpB</i> | Tryptophan synthase beta chain                                    |                                      |
| <i>trpC</i> | Indole-3-glycerol phosphate synthase                              |                                      |
| <i>trpD</i> | Anthranilate phosphoribosyltransferase                            |                                      |
| <i>nos</i>  | Nitric oxide synthase oxygenase                                   | Nitric oxide synthesis               |
| <i>alsS</i> | Acetolactate synthase                                             | 2,3-butanediol and acetoin synthesis |
| <i>alsD</i> | Acetolactate decarboxylase                                        |                                      |
| <i>ilvB</i> | Acetolactate synthase large subunit                               |                                      |
| <i>ilvH</i> | Acetolactate synthase small subunit                               |                                      |
| <i>bdhA</i> | 2, 3-butanediol dehydrogenase                                     |                                      |
| <i>budC</i> | Diacetyl reductase [(S)-acetoin forming]                          |                                      |
| <i>speA</i> | Arginine decarboxylase                                            | Spermidine synthesis                 |
| <i>speB</i> | Agmatinase                                                        |                                      |
| <i>speH</i> | S-adenosylmethionine decarboxylase proenzyme                      |                                      |
| <i>speE</i> | Polyamine aminopropyltransferase                                  |                                      |
| <i>phy</i>  | 3-Phytase                                                         |                                      |
| <i>phoR</i> | Alkaline phosphatase synthesis sensor protein                     | Alkaline phosphatase                 |
| <i>phoP</i> | Alkaline phosphatase synthesis transcriptional regulatory protein |                                      |
| <i>phoA</i> | Alkaline phosphatase 4                                            |                                      |
| <i>phoD</i> | Alkaline phosphatase D                                            |                                      |
| <i>flgB</i> | Flagellar basal body rod protein FlgB                             | Flagella biosynthesis                |
| <i>flgC</i> | Flagellar basal-body rod protein FlgC                             |                                      |
| <i>flgK</i> | Flagellar hook-associated protein 1                               |                                      |
| <i>flhA</i> | Flagellar biosynthesis protein FlhA                               |                                      |
| <i>fliD</i> | Flagellar hook-associated protein 2                               |                                      |
| <i>fliG</i> | Flagellar motor switch protein FliG                               |                                      |
| <i>fliJ</i> | Flagellar FliJ protein                                            |                                      |
| <i>fliM</i> | Flagellar motor switch protein FliM                               |                                      |
| <i>fliP</i> | Flagellar biosynthetic protein FliP                               |                                      |
| <i>fliQ</i> | Flagellar biosynthetic protein FliQ                               |                                      |
| <i>fliR</i> | Flagellar biosynthetic protein FliR                               |                                      |
| <i>fliS</i> | Flagellar secretion chaperone FliS                                |                                      |
| <i>cheA</i> | Chemotaxis protein CheA                                           | Chemotaxis                           |
| <i>cheB</i> | Protein-glutamate methylesterase                                  |                                      |
| <i>cheD</i> | Chemoreceptor glutamine deamidase CheD                            |                                      |
| <i>cheR</i> | Chemotaxis protein methyltransferase                              |                                      |
| <i>cheY</i> | Chemotaxis protein CheY                                           |                                      |
| <i>cheW</i> | Chemotaxis protein CheW                                           |                                      |
| <i>swrC</i> | Swarming motility protein SwrC                                    | Swarming motility                    |
| <i>bslB</i> | Biofilm-surface layer protein B                                   | Biofilm formation                    |
| <i>bslA</i> | Biofilm-surface layer protein A                                   |                                      |
| <i>tasA</i> | Major biofilm matrix component                                    |                                      |

|             |                                                |                                               |
|-------------|------------------------------------------------|-----------------------------------------------|
| <i>pgsA</i> | Glycerol-3-phosphate 3-phosphatidyltransferase | Poly-glutamic acid ( $\gamma$ -PGA) synthesis |
|-------------|------------------------------------------------|-----------------------------------------------|
